# Supplementary material for: Intra-Articular Injections Prior to Total Knee Arthroplasty Do Not Increase the Risk of Periprosthetic Joint Infection: A Prospective Cohort Study
Source: MDPI journal article supplement (doi:10.3390/antibiotics10030330), 2021-03-21
Supplement: s1 [file s1]

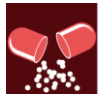

## Supplementary Material

**Table S1:** Literature review of the impact of intraarticular injection before surgery on the occurrence of infection.

| Author                   | Study Design                                                                                                                                                                                        | Patients, n | Results                                                                                                                                                      |
|--------------------------|-----------------------------------------------------------------------------------------------------------------------------------------------------------------------------------------------------|-------------|--------------------------------------------------------------------------------------------------------------------------------------------------------------|
| Papavasiliou et al, 2006 | Retrospective matched cohort study - 54 patients with intra-articular corticosteroids injection and 90 patients without                                                                             | 144         | Significant association between administration of corticosteroids in the 11 months before surgery and occurrence of deep infection                           |
| Joshy et al, 2006        | Retrospective matched cohort study - study group with 32 patients with confirmed deep infection, control group with 32 patients with no evidence of infection                                       | 64          | No significant difference in number of patients who received intra-articular steroid injection between the groups                                            |
| Horne et al, 2008        | Retrospective matched cohort study - study group with 38 patients with infection, and control group with 352 patients without infection                                                             | 390         | No significant difference with intra-articular injection of steroids                                                                                         |
| Desai et al, 2009        | Retrospective matched cohort study - 90 patients with intra-articular steroid injection prior to TKA and 180 patients without                                                                       | 270         | No significant difference in incidence of infection                                                                                                          |
| Amine et al, 2015        | Retrospective - 783 patients with intra-articular injection prior to TKA and 845 without                                                                                                            | 1 628       | No significant difference in incidence of infection                                                                                                          |
| Cancienne et al, 2015    | Retrospective, based on a national US database – 5313 patients with TKA within 3 months after knee injection, 8919 between 3 to 6 months, 8008 between 6 to 12 months, 13650 without knee injection | 35 890      | Significant increase of infection in patients who received intra-articular steroids injection > 3 months prior to TKA compared to patients without injection |



---

|                           |                                                                                                                                                  |        |                                                                                                                                                                                                                                                                  |
|---------------------------|--------------------------------------------------------------------------------------------------------------------------------------------------|--------|------------------------------------------------------------------------------------------------------------------------------------------------------------------------------------------------------------------------------------------------------------------|
| Bedard et al,<br>2017     | Retrospective, based on large<br>database - 29 603 patients with<br>intra-articular injection prior to<br>TKA, 54 081 without                    | 83 684 | Significant increase of infection in<br>patients who received intra-articular<br>injection compared to patients<br>without injection. Incidence of<br>infection was higher in the injection<br>cohort out to a duration of 6 months<br>between injection and TKA |
| Richardson<br>et al, 2019 | Retrospective, based on<br>national insurance database -<br>3249 patients who received<br>hyaluronic acid, 16656 who<br>received corticosteroids | 58 337 | Significantly increased risk of PJI<br>infection in patients who received<br>corticosteroids or hyaluronic acid<br>injections < 3 months before TKA                                                                                                              |

---
